# Supplementary material for: An alternative pathway contributes to phenylalanine biosynthesis in plants via a cytosolic tyrosine:phenylpyruvate aminotransferase
Source: Springer Nature journal article supplement (doi:10.1038/ncomms3833), 2013-11-25
Supplement: 41467_2013_BFncomms3833_MOESM819_ESM.pdf [file 41467_2013_BFncomms3833_MOESM819_ESM.pdf]

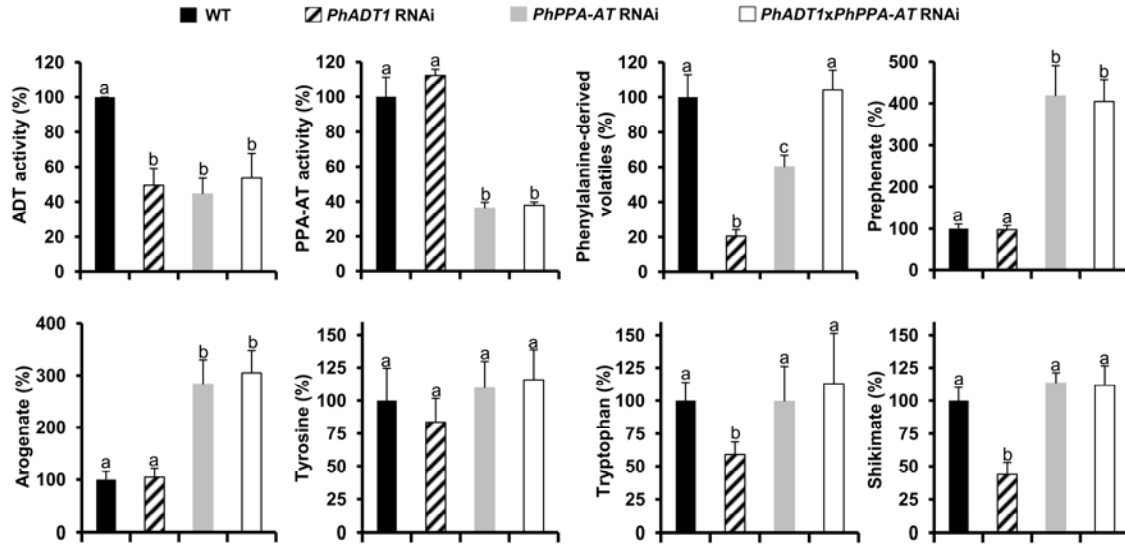

**Supplementary Figure S1 | Effect of simultaneous *PhADT1* and *PhPPA-AT* downregulation on the levels of phenylalanine-derived volatiles, tyrosine, tryptophan, aromatic amino acid intermediates, and shikimate in petunia flowers.**

The levels of plastidial ADT and PPA-AT activity ( $n = 5$  biological replicates), phenylalanine-derived volatiles ( $n \geq 5$ ), prephenate, arogenate, tyrosine, tryptophan and shikimate ( $n \geq 6$ ) in petals of wild-type (WT; black) and the *PhADT1* (striped), *PhPPA-AT* (gray), and *PhADT1xPhPPA-AT* (white) RNAi lines harvested at 8 PM, 2 d postanthesis. Data are presented relative to corresponding WT controls set at 100% (687.5 nmol g FW<sup>-1</sup> h<sup>-1</sup> for phenylalanine-derived volatiles, 0.10 and 2.60 nkat mg protein<sup>-1</sup> for plastidial ADT1 and PPA-AT activities, respectively; 3.5, 21.4, 12.6, 16.0, 36.9 nmol g FW<sup>-1</sup> for prephenate, arogenate, tyrosine, tryptophan, and shikimate, respectively). Data are means  $\pm$  s.e.m. Columns with the same letters above are not significantly different based on Tukey's test ( $P < 0.05$ ; One-way ANOVA).

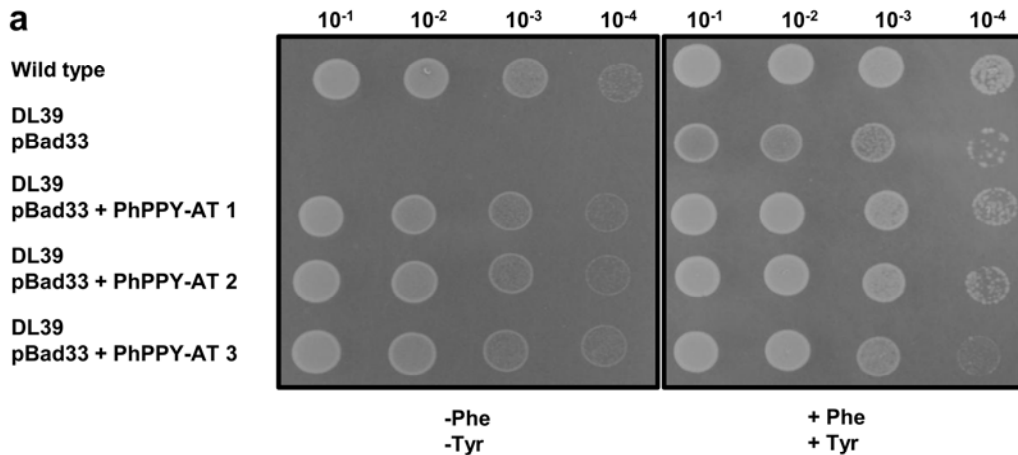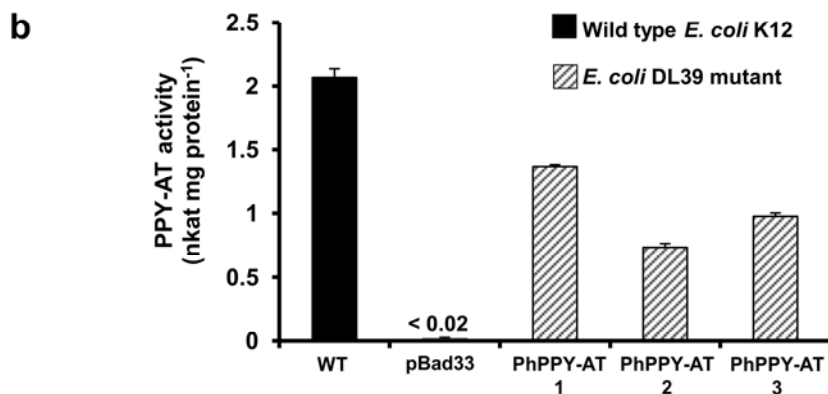

**Supplementary Figure S2 | Functional complementation of the phenylalanine auxotrophic *E. coli* mutant DL39 by *PhPPY-AT*.**

(a) Wild-type *E. coli* (K12), the DL39 mutant transformed with pBad33 alone, and three independent clones of DL39 containing the pBad33-PhPPYAT construct were grown to an  $OD_{600} = 1$  in M9 liquid media, washed, and serially diluted to  $OD_{600} = 1 \times 10^{-1}$ ,  $10^{-2}$ ,  $10^{-3}$  and  $10^{-4}$ . Five  $\mu\text{L}$  of cells at each cell density were plated on M9 solid media containing 0.2% arabinose and  $50 \mu\text{g ml}^{-1}$  aspartic acid, valine, leucine and isoleucine, with and without  $50 \mu\text{g ml}^{-1}$  phenylalanine and tyrosine. (b) *In vitro* assays measuring PPY-AT activity with glutamate as an amino donor and phenylpyruvate as the keto acid acceptor were performed using crude extracts prepared from cells of wild-type (K12), the DL39 mutant transformed with empty pBad33, and the DL39 mutant harboring pBad33-PhPPYAT. Reactions were carried out at  $30^\circ\text{C}$  for 30 min with  $74 \mu\text{g}$  of crude extract proteins. Data are means  $\pm$  s.e.m. ( $n = 3$  independent experiments).

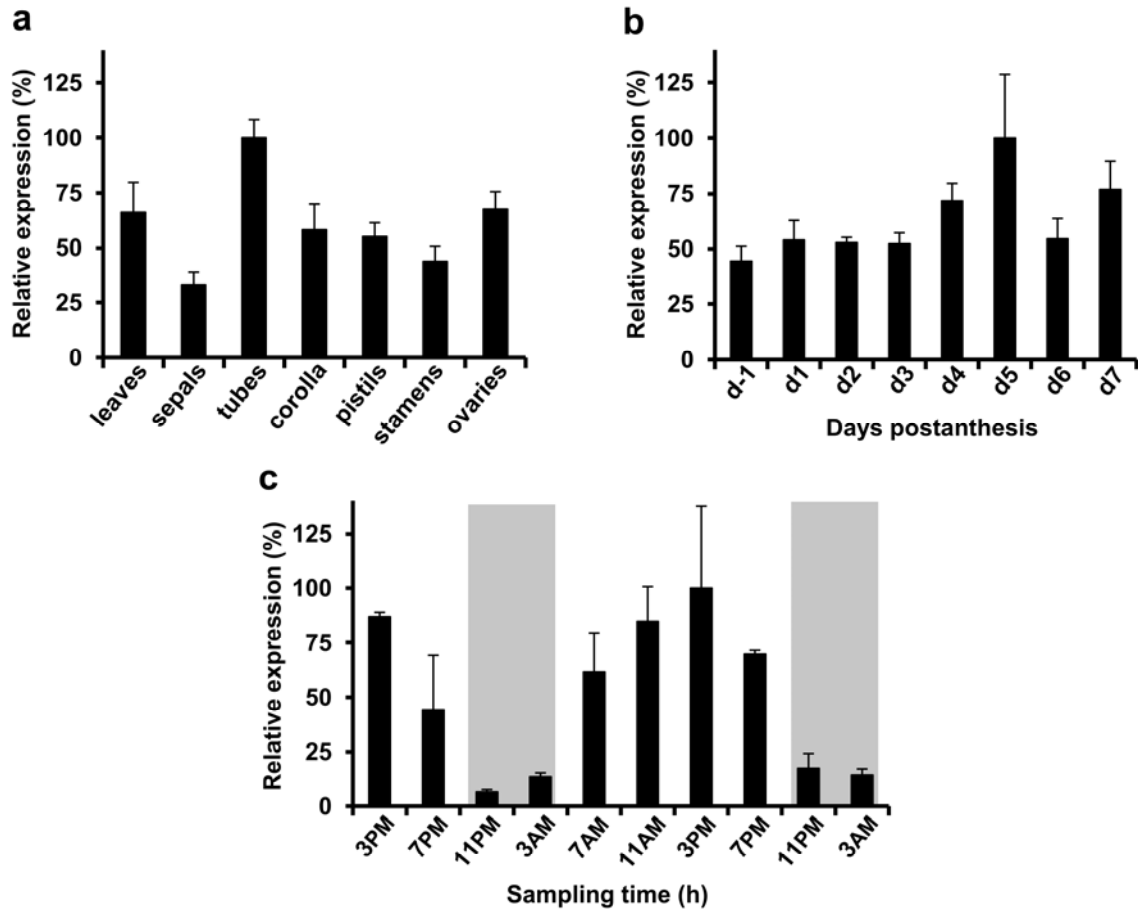

**Supplementary Figure S3 | Expression profiles of *PhPPY-AT* in petunia flowers.**

(a) Tissue specific expression of *PhPPY-AT* presented relative to levels in tubes set as 100%. (b) Developmental *PhPPY-AT* expression profile in corolla of petunia flowers from the mature bud stage (d -1) to 7 d postanthesis presented relative to level on d 5, set as 100%. (c) Diurnal expression profiles of *PhPPY-AT* in corolla of petunia flowers d 1 to d 3 postanthesis grown under a normal light/dark cycle presented relative to the level at 3 PM on d 2 postanthesis set as 100%. The dark cycles (9 PM to 6 AM) are shown with gray background. Data are means  $\pm$  s.e.m. ( $n = 4$  biological replicates)

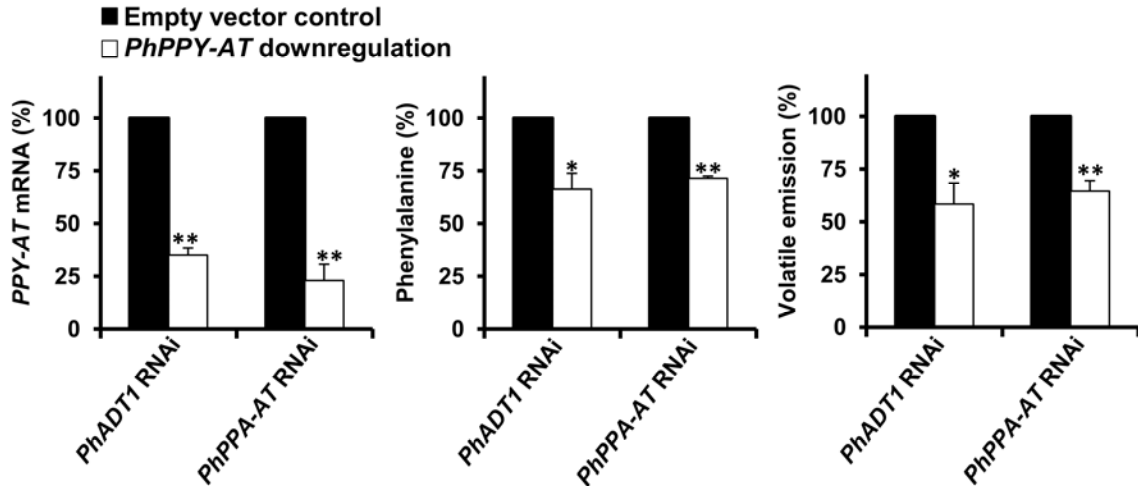

**Supplementary Figure S4 | Effect of *PhPPY-AT* downregulation on phenylalanine and phenylalanine-derived volatile levels in petunia flowers of *PhADT1* and *PhPPA-AT* RNAi parental lines.**

Downregulation of *PhPPY-AT* in petunia flowers (left panel) significantly decreases the levels of phenylalanine (middle panel) and phenylalanine-derived volatiles (right panels). For each genetic background, black and white columns represent flowers infiltrated with the empty vector or the *PhPPY-AT* RNAi construct, respectively. Data are presented as a percentage relative to the corresponding empty-vector reference. Data are means  $\pm$  s.e.m. ( $n \geq 3$  biological replicates). \*  $P < 0.05$  and \*\*  $P < 0.01$  as determined by paired two-tailed Student's t-tests.

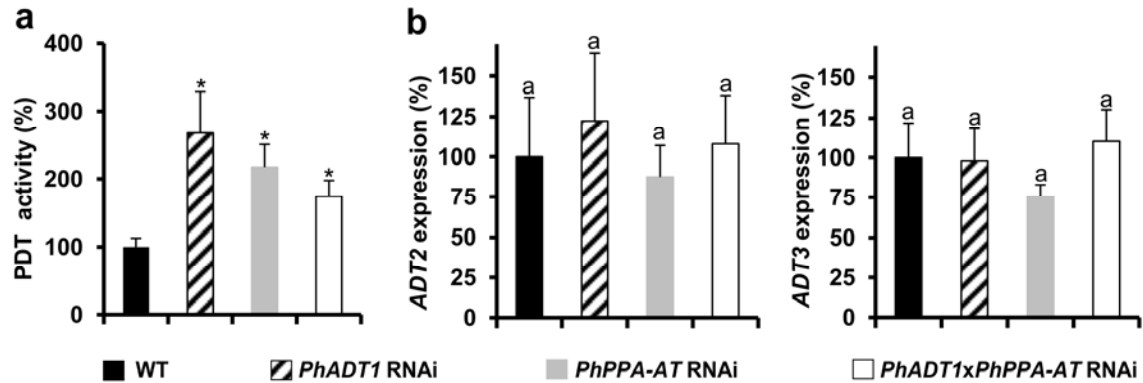

**Supplementary Figure S5 | Effect of simultaneous *PhADT1* and *PhPPA-AT* downregulation on PDT activity, and expression levels of *PhADT2* and *PhADT3* in petunia flowers.**

(a) PDT activities were determined using triple quadruple LC/MS in plastids isolated from d 1 to d 3 old petunia flowers of wild-type (WT; black) and the *PhADT1* (striped), *PhPPA-AT* (gray), and *PhADT1xPhPPA-AT* (white) RNAi lines harvested at 8 PM. Data are presented relative to the level in WT ( $0.468 \text{ pkat mg protein}^{-1}$ ) set as 100%. Data are means  $\pm$  s.e.m. ( $n = 5$  biological replicates). \*  $P < 0.05$  as determined by unpaired two-tailed Student's t-test between WT and each transgenic line. (b) *PhADT2* and *PhADT3* mRNA levels were determined by qRT-PCR with gene-specific primers in corollas of petunia flowers from WT (black) and the *PhADT1* (striped), *PhPPA-AT* (gray), and *PhADT1xPhPPA-AT* (white) RNAi lines harvested at 8 PM 2 d postanthesis. Data are presented relative to corresponding levels in WT set as 100%. Data are means  $\pm$  s.e.m. ( $n = 3$  biological replicates). Columns with the same letters above are not significantly different based on Tukey's test ( $P < 0.05$ ; One-way ANOVA).

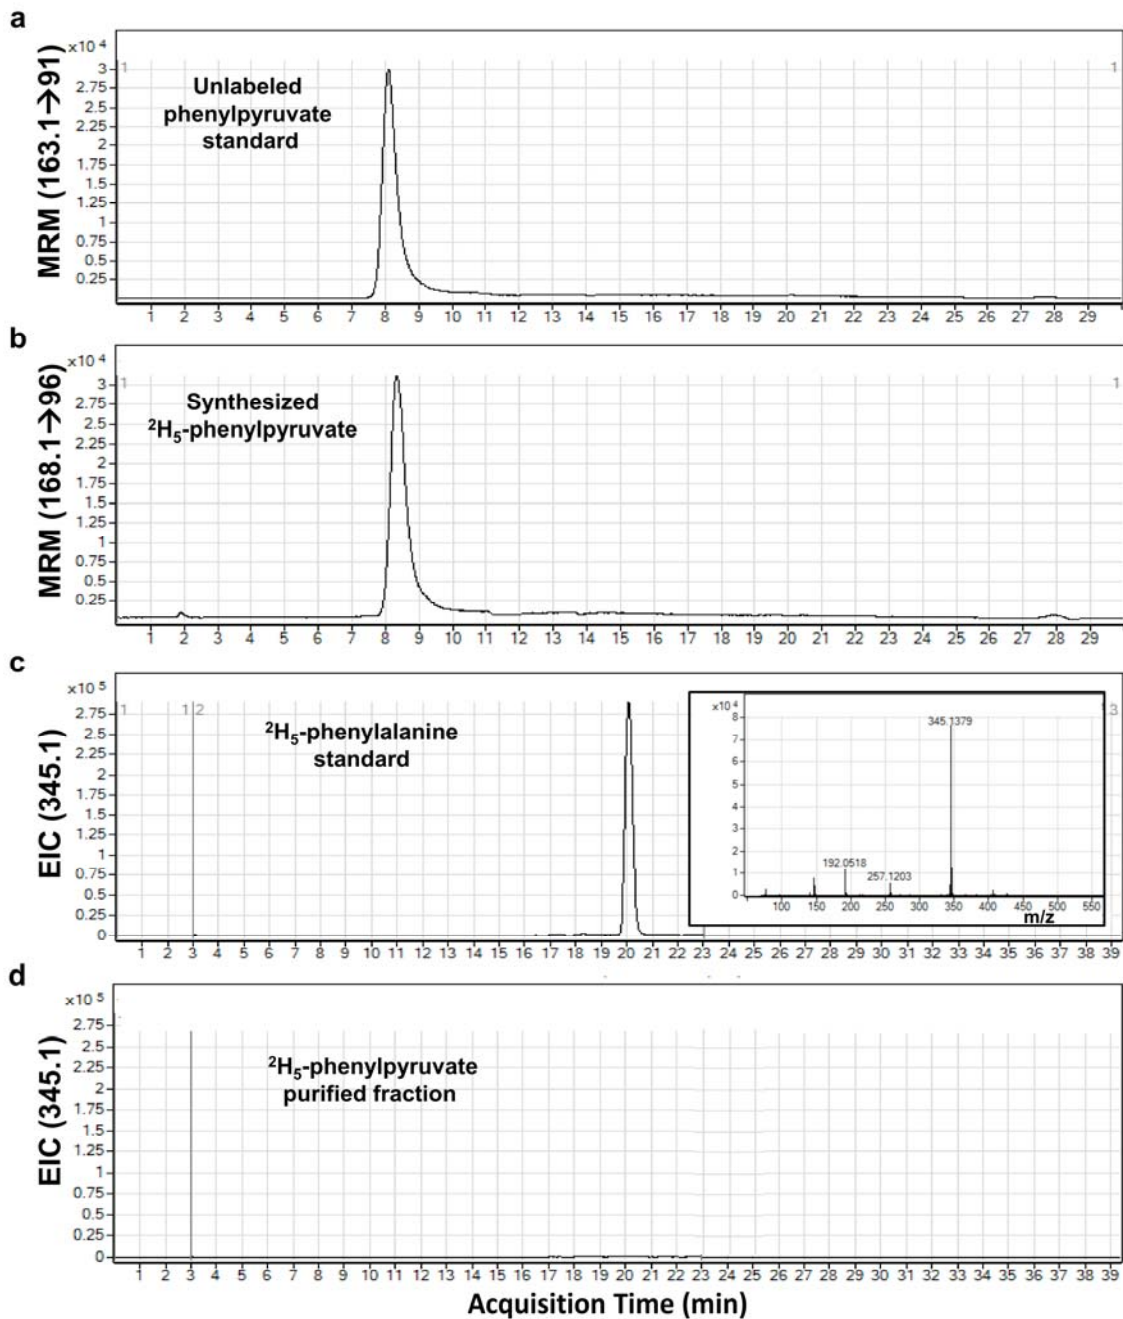

**Supplementary Figure S6 | Verification of product formation and purity of enzymatically synthesized L-[ring-<sup>2</sup>H<sub>5</sub>]-Phenylpyruvate.** L-[ring-<sup>2</sup>H<sub>5</sub>]-Phenylpyruvate was synthesized by enzymatic conversion of L-[ring-<sup>2</sup>H<sub>5</sub>]-phenylalanine by melon CmArAt1. The dominant ion of non-labeled phenylpyruvate (91 m/z) detected by Triple Quadrupole LC/MS in an authentic phenylpyruvate standard (a) is shifted in enzymatically synthesized L-[ring-<sup>2</sup>H<sub>5</sub>]-phenylpyruvate to 96 m/z (b). Phenylpyruvate and

L-[ring-<sup>2</sup>H<sub>5</sub>]-phenylpyruvate were monitored in MRM (Multiple Reaction Monitoring) mode and quantified based on a standard calibration curve generated with an authentic non labeled phenylpyruvate standard. (c) Authentic standard of L-[ring-<sup>2</sup>H<sub>5</sub>]-phenylalanine after OPA derivatization analyzed by TOF LC/MS. (d) OPA derivitization of L-[ring-<sup>2</sup>H<sub>5</sub>]-phenylpyruvate shown in (b) to assess the purity of synthesized labeled phenylpyruvate and removal of L-[ring-<sup>2</sup>H<sub>5</sub>]-phenylalanine substrate. L-[ring-<sup>2</sup>H<sub>5</sub>]-phenylalanine derivatized by OPA was monitored in extracted ion chromatogram (EIC) mode of 345.1 m/z. Inserted panel in (c) shows mass spectra of L-[ring-2H5]-phenylalanine.

**Supplementary Table S1 | Emissions of phenylalanine-derived volatiles in wild-type (WT) and the *PhADT1*, *PhPPA-AT*, and *PhADT1xPhPPA-AT* RNAi lines.**

| Emitted volatiles<br>(nmol g FW <sup>-1</sup> h <sup>-1</sup> ) | WT                              | <i>PhADT1</i><br>RNAi           | <i>PhPPA-AT</i><br>RNAi         | <i>PhADT1xPhPPA-AT</i><br>RNAi  |
|-----------------------------------------------------------------|---------------------------------|---------------------------------|---------------------------------|---------------------------------|
| Benzaldehyde                                                    | 136.0 ± 20.3 <sup>a,c</sup>     | 15.8 ± 3.2 <sup>b</sup>         | 85.0 ± 15.0 <sup>c</sup>        | 156.8 ± 18.1 <sup>a</sup>       |
| Benzyl alcohol                                                  | 10.0 ± 2.2 <sup>a,b</sup>       | 0.7 ± 0.2 <sup>b</sup>          | 7.6 ± 1.0 <sup>a,b</sup>        | 17.0 ± 5.4 <sup>a</sup>         |
| Phenylacetaldehyde                                              | 42.4 ± 9.3 <sup>a</sup>         | 3.4 ± 0.9 <sup>b</sup>          | 14.0 ± 2.6 <sup>b,c</sup>       | 39.4 ± 8.3 <sup>a,c</sup>       |
| Methylbenzoate                                                  | 275.2 ± 28.6 <sup>a,c</sup>     | 65.0 ± 10.3 <sup>b</sup>        | 195.0 ± 23.0 <sup>c</sup>       | 289.0 ± 21.0 <sup>a</sup>       |
| Phenylethanol                                                   | 13.1 ± 1.2 <sup>a</sup>         | 0.9 ± 0.5 <sup>b</sup>          | 7.5 ± 0.7 <sup>c</sup>          | 13.9 ± 1.9 <sup>a</sup>         |
| Benzylacetate                                                   | 0.4 ± 0.1 <sup>a,b</sup>        | 0.1 ± 0.0 <sup>b</sup>          | 0.3 ± 0.1 <sup>b</sup>          | 0.7 ± 0.1 <sup>a</sup>          |
| Eugenol                                                         | 3.0 ± 0.5 <sup>a</sup>          | 0.9 ± 0.2 <sup>b</sup>          | 1.9 ± 0.3 <sup>a,b</sup>        | 3.0 ± 1.0 <sup>a</sup>          |
| Isoeugenol                                                      | 194.3 ± 36.6 <sup>a</sup>       | 52.0 ± 13.0 <sup>b</sup>        | 97.2 ± 30.2 <sup>a,b</sup>      | 182.7 ± 35.8 <sup>a</sup>       |
| Benzylbenzoate                                                  | 13.0 ± 3.3 <sup>a</sup>         | 2.1 ± 0.7 <sup>b</sup>          | 5.2 ± 1.1 <sup>a,b</sup>        | 13.1 ± 3.4 <sup>a</sup>         |
| Phenylethylbenzoate                                             | 0.3 ± 0.1 <sup>a</sup>          | 0.0 ± 0.0 <sup>b</sup>          | 0.1 ± 0.0 <sup>b</sup>          | 0.2 ± 0.0 <sup>a,b</sup>        |
| <b>Total emitted volatiles</b>                                  | <b>687.5 ± 88.9<sup>a</sup></b> | <b>140.7 ± 25.4<sup>b</sup></b> | <b>413.2 ± 45.6<sup>c</sup></b> | <b>715.6 ± 78.4<sup>a</sup></b> |

Volatiles were collected from 6 PM to 10 PM using six flowers harvested at d 2 postanthesis. Data are means ± s.e.m. ( $n = 5$  biological replicates). Means with the same letters within the row are not significantly different based on Tukey's test ( $P < 0.05$ ; One-way ANOVA).



**Supplementary Table S2 | Amino donor specificities of petunia PhPPY-AT for forward and reverse reactions.**

| <b>keto acid substrate</b>           | <b>amino donor<sup>c</sup></b> | <b>PhPPY-AT</b>  |
|--------------------------------------|--------------------------------|------------------|
| <b><i>Forward</i></b>                |                                |                  |
| phenylpyruvate <sup>a</sup>          | tyrosine                       | 100 <sup>d</sup> |
|                                      | methionine                     | 12.4 ± 0.45      |
|                                      | glutamate                      | 12.3 ± 0.21      |
|                                      | leucine                        | 10.6 ± 0.45      |
|                                      | tryptophan                     | 6.6 ± 0.32       |
|                                      | histidine                      | 3.0 ± 0.22       |
|                                      | glutamine                      | 0.8 ± 0.04       |
|                                      | aspartate                      | 0.2 ± 0.02       |
| <b><i>Reverse</i></b>                |                                |                  |
| 4-hydroxyphenylpyruvate <sup>b</sup> | phenylalanine                  | 5.8 ± 0.19       |
|                                      | glutamate                      | 5.2 ± 0.29       |
|                                      | methionine                     | 5.0 ± 0.23       |
|                                      | leucine                        | 4.6 ± 0.16       |
|                                      | tryptophan                     | 2.7 ± 0.04       |
|                                      | histidine                      | 1.4 ± 0.04       |
|                                      | glutamine                      | 0.3 ± 0.05       |
|                                      | aspartate                      | 0.1 ± 0.06       |

<sup>a</sup>Phenylpyruvate concentration was 10 mM.

<sup>b</sup>4-hydroxyphenylpyruvate concentration was 4 mM since at higher concentrations inhibition was observed

<sup>c</sup>Amino donor substrate concentration was 10 mM.

<sup>d</sup>PhPPY-AT activity with phenylpyruvate and tyrosine as substrates was 23.6 nkat mg protein<sup>-1</sup> and set as 100%.

Data are means ± s.e.m. (*n* = 3 independent experiments).

**Supplementary Table S3 | Keto acid substrate specificities of petunia PhPPY-AT.**

| <b>keto acid substrate<sup>a</sup></b> | <b>amino donor<sup>b</sup></b> | <b>PhPPY-AT</b>  |
|----------------------------------------|--------------------------------|------------------|
| Phenylpyruvate                         | L-tyrosine                     | 100 <sup>c</sup> |
| $\alpha$ -ketoglutarate                |                                | 44.0 $\pm$ 1.04  |
| Oxaloacetate                           |                                | 2.1 $\pm$ 0.13   |
| Prephenate                             |                                | n.d.             |
| Pyruvate                               |                                | n.d.             |
| Phenylpyruvate                         | L-glutamate                    | 12.2 $\pm$ 0.96  |
| Pyruvate                               |                                | 4.2 $\pm$ 0.23   |
| Oxaloacetate                           |                                | 2.8 $\pm$ 0.40   |
| 4-hydroxyphenylpyruvate                |                                | 2.5 $\pm$ 0.08   |
| Prephenate                             |                                | n.d.             |

<sup>a</sup>Keto acid and amino donor<sup>b</sup> substrate concentrations were 10 mM.

<sup>c</sup>PhPPY-AT activity with phenylpyruvate and tyrosine as substrates was 23.6 nkat mg protein<sup>-1</sup> and set as 100%.

Data are means  $\pm$  s.e.m. ( $n = 3$  independent experiments).

n.d., not detectable

### Supplementary Table S4 | Catalytic activity of CmArAT1

| Reactions : Phenylpyruvate + Tyrosine ↔ Phenylalanine + 4-hydroxyphenylpyruvate<br>Phenylpyruvate + Glutamate ↔ Phenylalanine + α-ketoglutarate |                            |                                                                          |
|-------------------------------------------------------------------------------------------------------------------------------------------------|----------------------------|--------------------------------------------------------------------------|
| keto acid substrate <sup>a</sup>                                                                                                                | amino donor <sup>b</sup>   | <i>V</i> <sub>max</sub> (nmol s <sup>-1</sup> mg protein <sup>-1</sup> ) |
| <b>Forward</b>                                                                                                                                  |                            |                                                                          |
| Phenylpyruvate                                                                                                                                  | tyrosine <sup>a</sup>      | 54.59 ± 1.94                                                             |
| Phenylpyruvate                                                                                                                                  | glutamate <sup>a</sup>     | 1.47 ± 0.02                                                              |
| <b>Reverse</b>                                                                                                                                  |                            |                                                                          |
| 4-hydroxyphenylpyruvate                                                                                                                         | phenylalanine <sup>b</sup> | 12.35 ± 0.39                                                             |
| α-ketoglutarate                                                                                                                                 | phenylalanine <sup>b</sup> | 8.19 ± 0.08                                                              |

Enzymatic reactions were carried out at 30°C for 10 min in the presence of 5 µg of recombinant CmArAT1. When tyrosine was used as an amino donor, 0.3 µg of CmArAT1 was used and reactions were carried out at 30°C for 3 min.

<sup>a</sup>Keto acid and amino donor<sup>b</sup> substrate concentrations were 10 mM.

Data are means ± s.e.m. (*n* = 3 independent experiments).

**Supplementary Table S5 | Amino donor specificity of CmArAT1 with phenylpyruvate as the amino acceptor.**

| <b>keto acid substrate</b>  | <b>amino donor<sup>b</sup></b> | <b>CmArAT1</b>     |
|-----------------------------|--------------------------------|--------------------|
| phenylpyruvate <sup>a</sup> | tyrosine                       | 100.0 <sup>c</sup> |
|                             | glutamate                      | 2.7 ± 0.04         |
|                             | methionine                     | 2.6 ± 0.07         |
|                             | leucine                        | 3.8 ± 0.43         |
|                             | tryptophan                     | 3.5 ± 0.38         |
|                             | histidine                      | 0.96 ± 0.09        |
|                             | glutamine                      | 0.15 ± 0.008       |
|                             | aspartate                      | n.d.               |

Enzymatic reactions were carried out at 30°C for 10 min in the presence of 5 µg of recombinant CmArAT1. When tyrosine was used as an amino donor, 0.3 µg of CmArAT1 was used and reactions were carried out at 30°C for 3 min.

<sup>a</sup>Phenylpyruvate and amino donor<sup>b</sup> substrate concentrations were 10 mM.

<sup>c</sup>CmArAT1 activity with phenylpyruvate and tyrosine as substrates was 54.6 nkat mg protein<sup>-1</sup> and set as 100%.

Data are means ± s.e.m. (*n* = 3 independent experiments).

n.d., not detectable

**Supplementary Table S6 | Sequence information of primers used for qRT-PCR analysis**

| <b>Primers</b>                    | <b>Sequence</b>                 |
|-----------------------------------|---------------------------------|
| <i>PhADT1</i> for <sup>16</sup>   | 5'-TAACTGCGAAGCCATTCCCTGC-3'    |
| <i>PhADT1</i> rev <sup>16</sup>   | 5'-CTCTACTGGTAGAACTGCGCG-3'     |
| <i>PhADT2</i> for <sup>16</sup>   | 5'-ACGAAGTTGGGTTTGGTCAG-3'      |
| <i>PhADT2</i> rev <sup>16</sup>   | 5'-TGCCCCTGCATCTTTTAGTT-3'      |
| <i>PhADT3</i> for <sup>16</sup>   | 5'-CAAAATGTGAAGCTATTCCTTGTG-3'  |
| <i>PhADT3</i> rev <sup>16</sup>   | 5'-TTCGATCGGTAAAACAGCACG-3'     |
| <i>PhCM1</i> for <sup>16</sup>    | 5'-CCTGCTGTTGAAGAGGCTATCA-3'    |
| <i>PhCM1</i> rev <sup>16</sup>    | 5'-CAGGGTCACCTCCATTTTCTG-3'     |
| <i>PhPPA-AT</i> for <sup>17</sup> | 5'-GCAATGACTGGTTGGAGACTTG-3'    |
| <i>PhPPA-AT</i> rev <sup>17</sup> | 5'-TCACATCAGGTGCCAGTAGCA-3'     |
| <i>PhUBQ</i> for <sup>16</sup>    | 5'-GTTAGATTGTCTGCTGTCGATGGT-3'  |
| <i>PhUBQ</i> rev <sup>16</sup>    | 5'-AGGAGCCAATTAAGCACTTATCAA-3'  |
| <i>AtTYDC</i> for <sup>38</sup>   | 5'-GATCCAAGTTTTGAGGTTGTCACTA-3' |
| <i>AtTYDC</i> rev <sup>38</sup>   | 5'-ACGGTTACGTTTCGTTACATTGG-3'   |
